# Supplementary material
Source: PubMed Central journal article supplement (PMC2761723)
Supplement: NIHMS24357-supplement-01.pdf [file NIHMS24357-supplement-01.pdf]

## One-Pot Synthesis of New Symmetric and Asymmetric Xanthene Dyes

Scott A. Hilderbrand and Ralph Weissleder  
Center for Molecular Imaging Research, Massachusetts General Hospital/Harvard  
Medical School, Charlestown, Massachusetts 02129, USA

Tel.: +1-617-726-5788; fax: +1-617-726-5708; e-mail:  
Scott\_Hilderbrand@hms.harvard.edu

HPLC traces for all compounds. Data were collected on a Waters Alliance 2695 instrument equipped with a 2996 photodiode array detector and a Grace-Vydac column (218TP5210). For all traces a 15 min gradient from 0 to 100% buffer B and a flow rate of 0.3 mL/min was used. Buffer A consisted of water and 0.1% TFA and buffer B was composed of 90% acetonitrile and 10% water with 0.1% TFA added.

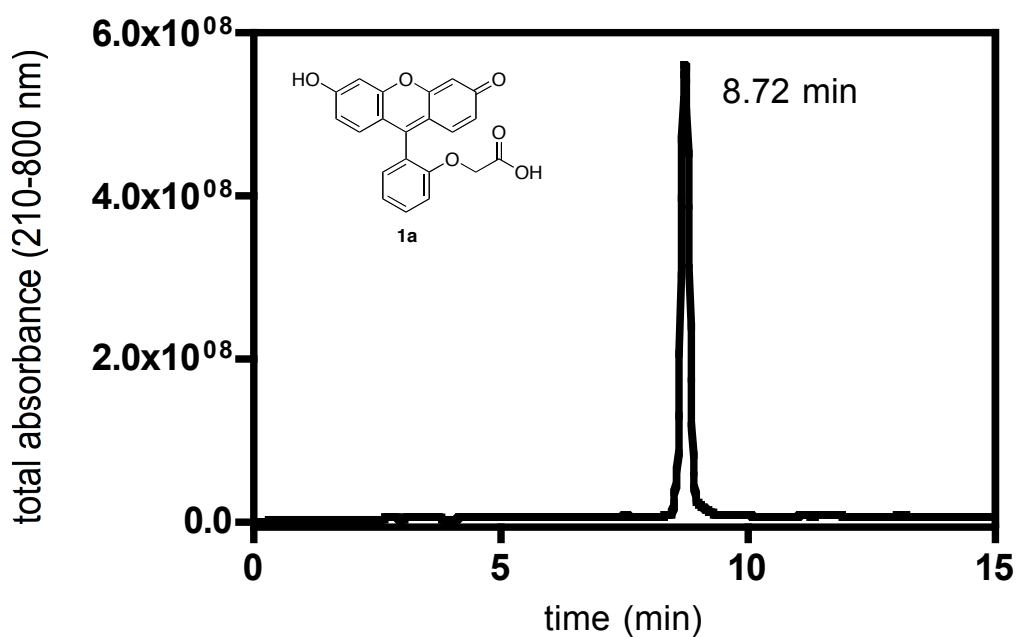

Figure S1. HPLC trace of compound 1a.

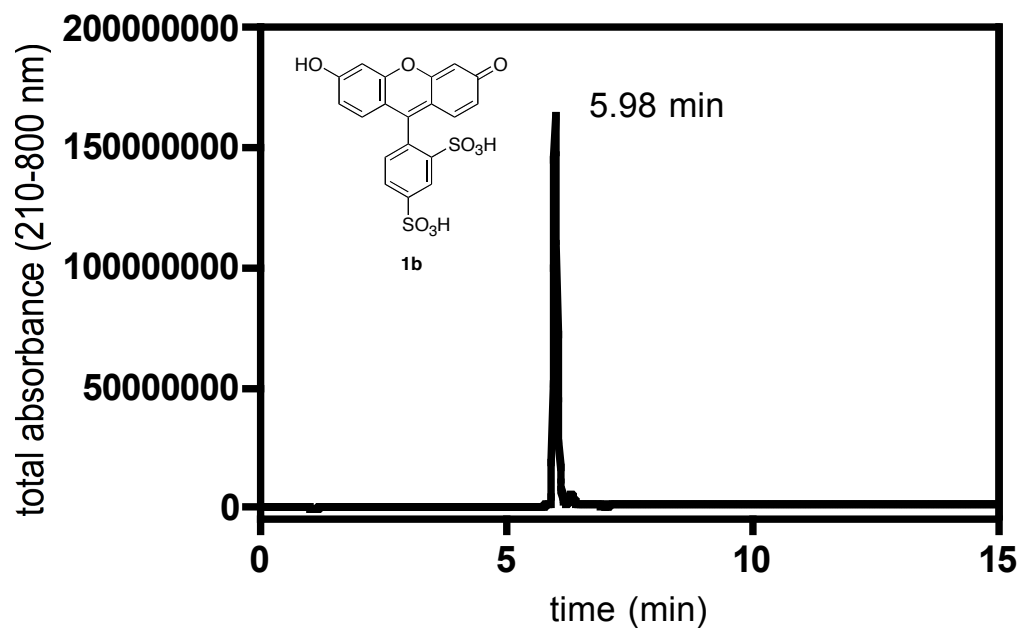

Figure S2. HPLC trace of compound 1b.

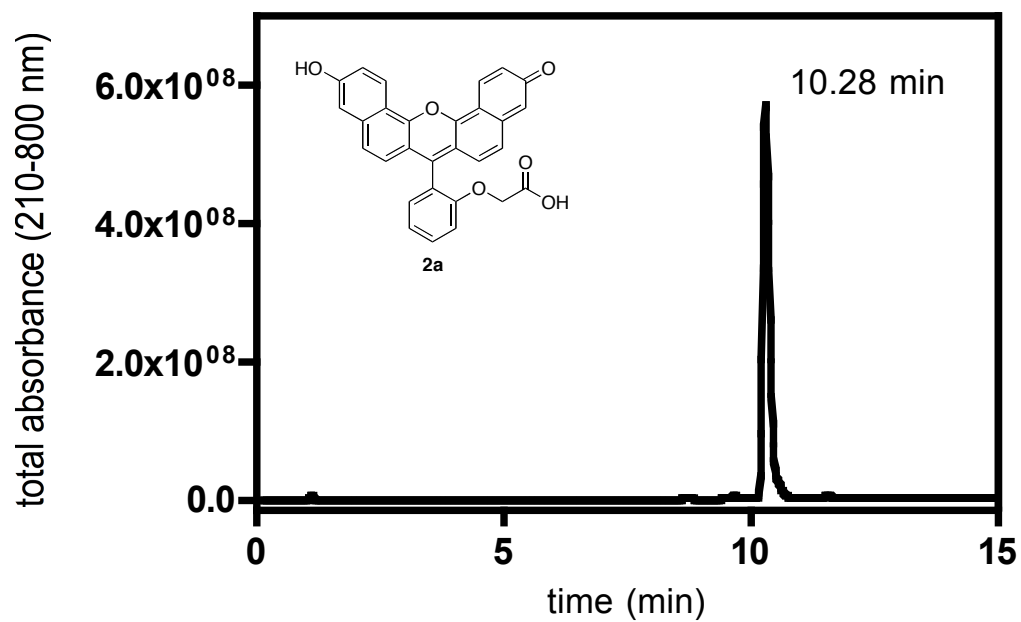

Figure S3. HPLC trace of compound 2a.

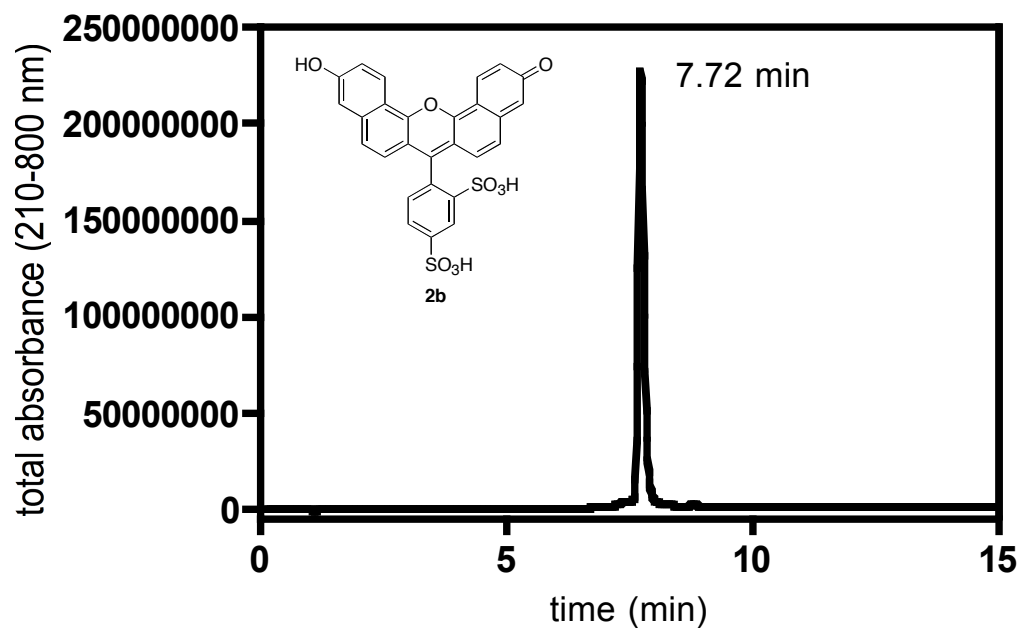

Figure S4. HPLC trace of compound 2b.

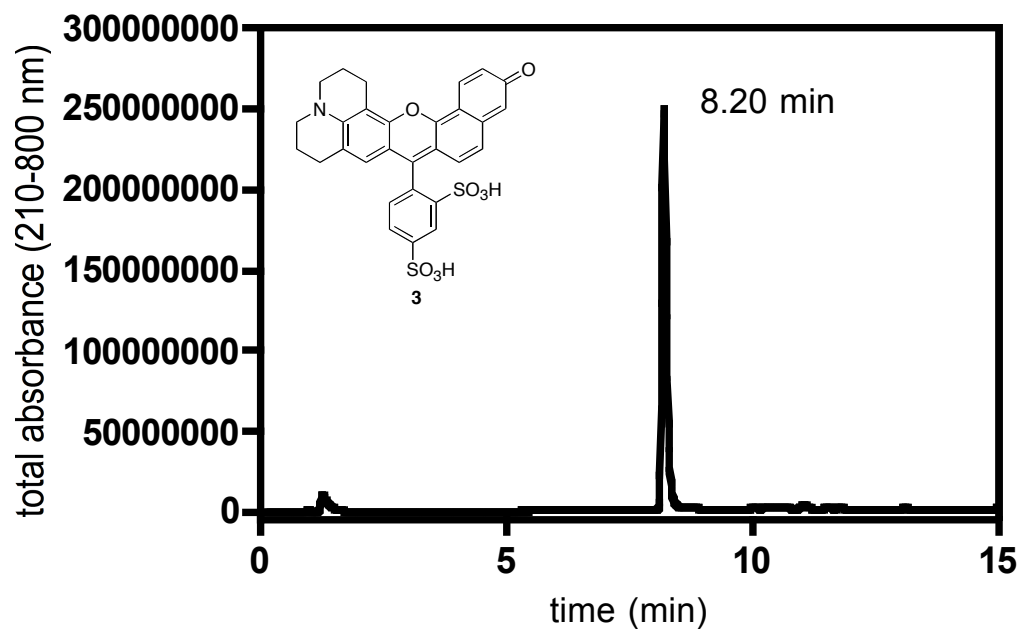

Figure S5. HPLC trace of compound 3.
